# Supplementary material
Source: publisher figshare collection journal article supplement (https://gsajournals.figshare.com/ndownloader/files/13430792)
Supplement: Supplementary file 1 [file 13430792]

## Sheet: Sheet1
Supplementary Table 4. Recessive inheritance of muw in different background.
Cross combination	Number of F2 plant (WT:mut)	P-vaule
B73×muw	140:52	0.5
Mo17×muw	142:54	0.41
H21×muw	145:50	0.84
Zong3×muw	140:45	0.83
Shen5003×muw	148:41	0.29
Huangzaosi×muw	143:50	0.77
